# Supplementary material
Source: publisher site journal article supplement (https://www.dovepress.com/article/333496)
Supplement: Supplementary file 1 [file get_supplementary_file.php]

Supplementary data for

Superparamagnetic iron oxide nanoparticles protect human gingival fibroblasts from *Porphyromonas gingivalis* invasion and inflammatory stimulation

Yulian Chen1, 2, Qian Zhang1, Xuan Qin1, Jin Li1, Yantao Zhao3, 4*, Yang Xia1*

1 Jiangsu Key Laboratory of Oral Diseases, Nanjing Medical University, Nanjing, Jiangsu 210029, China

2 The Affiliated Stomatological Hospital of Soochow University, Suzhou Stomatological Hospital, Suzhou, Jiangsu 215005, China

3 Institute of Orthopedics, Fourth Medical Center of the General Hospital of CPLA, Beijing 100048, China

4 Beijing Engineering Research Center of Orthopedics Implants, Beijing 100048, China

* To whom correspondence should be addressed: Associate Prof. Yang Xia, Jiangsu Key Laboratory of Oral Diseases, Nanjing Medical University, Nanjing, Jiangsu 210029, China. Email: xiayang@njmu.edu.cn. Fax: +86-25-86516414. Associate Prof. Yantao Zhao, Institute of Orthopedics, Fourth Medical Center of the General Hospital of CPLA, Beijing 100048, China. Email: 45828016@qq.com. Fax: +86-010-66848865.

Table of content

1. Figure S1. The identification of human gingival fibroblasts (hGFs).

2. Figure S2. The proinflammatory cytokine expressions of hGFs stimulated by *Porphyromonas gingivalis* (*P.g*) LPS under 50 and 100 μg/mL polyglucose sorbitol carboxymethyl ether (PSC)-coated superparamagnetic iron oxide nanoparticles (SPIONs).

3. Figure S3. Iron content detection by inductively coupled plasma optical emission spectrometer (ICP-OES).

**1. Figure S1.** The identification of human gingival fibroblasts (hGFs). The fibroblastic nature of the cells was confirmed by examining the expression of Vimentin (CST, USA) and Keratin (CST, USA). (A) The images of primary hGFs under Inverted electron microscope (Olympus, Japan). (B) The fluorescence staining images of Vimentin and Keratin in hGFs. Red fluorescence indicates Vimentin, and blue fluorescence indicates cell nucleus. The results prove that the cells are positive for Vimentin and negative for Keratin. It suggests that the cells are of mesenchymal origin rather than epithelial origin. Therefore, these gingival cells should be hGFs. (Scale bar=100 μm)


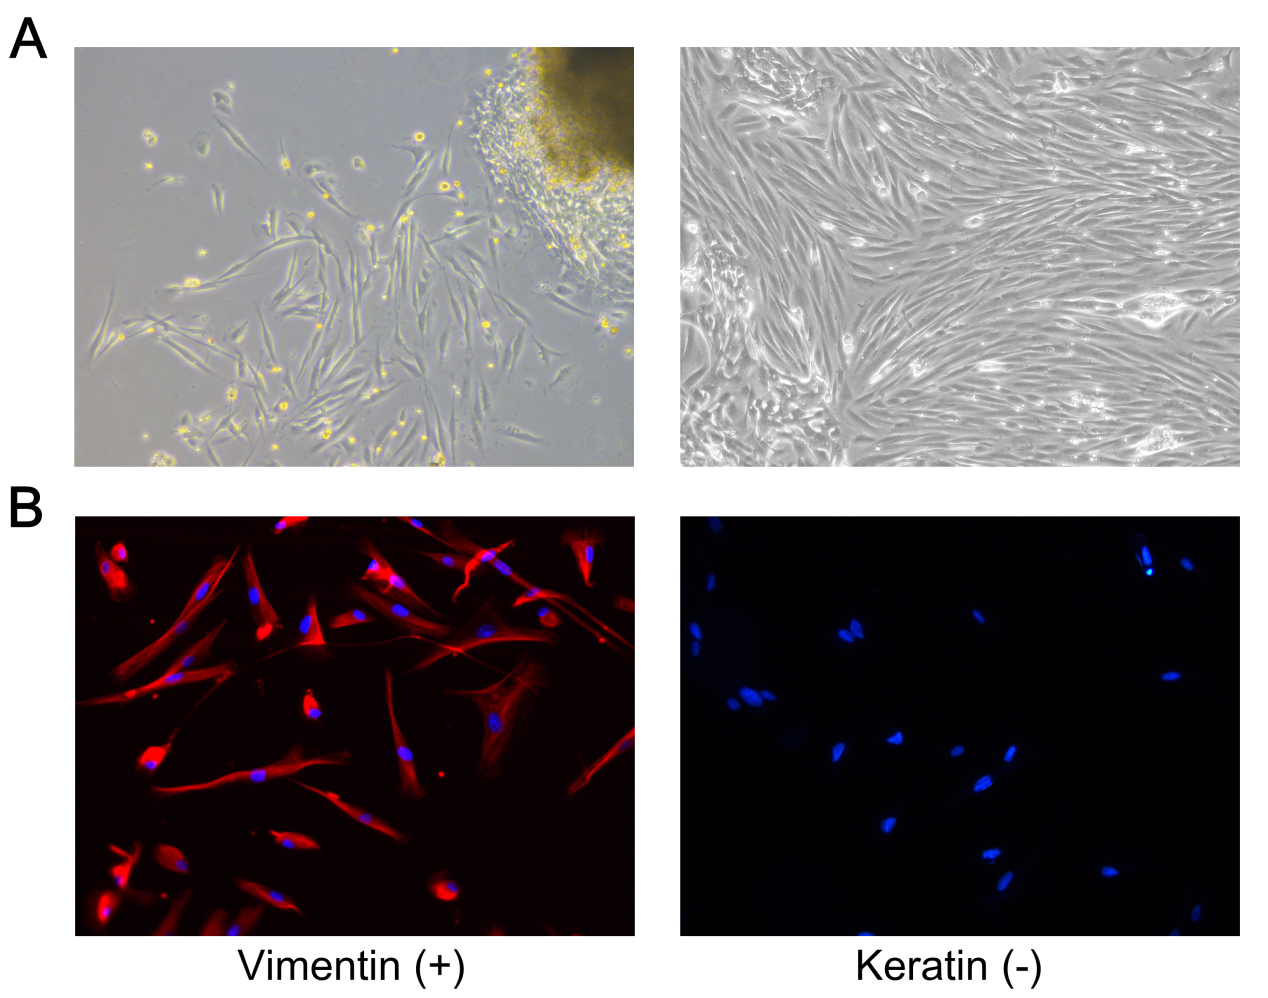


**2. Figure S2.** The proinflammatory cytokine expressions of hGFs stimulated by *Porphyromonas gingivalis* (*P.g*) LPS under 50 and 100 μg/mL polyglucose sorbitol carboxymethyl ether (PSC)-coated superparamagnetic iron oxide nanoparticles (SPIONs). hGFs were pretreated with 50 and 100 μg/mL PSC-SPIONs for 6h and then stimulated by 1 μg/mL *P.g* LPS for 24h (50-P-S+LPS and 100-P-S+LPS). The hGFs only co-cultured with LPS were positive control (hGF+LPS), while the hGFs without PSC-SPIONs and LPS were negative control (hGF). The results show that *P.g* LPS induce the mRNA expression of IL-6 (*P*<0.05) and IL-8 (*P*<0.01). Compared with hGF+LPS, 50-P-S+LPS increases the expression of IL-8 (*P*<0.01), while 100-P-S+LPS increases the expression of both IL-6 (*P*<0.05) and IL-8 (*P*<0.01). These results indicat that 50 and 100 μg/mL PSC-SPIONs cannot inhibit the expression of proinflammatory cytokines of hGFs stimulated by *P.g* LPS. # *P*<0.05, ## *P*<0.01 (compared with hGF). *P*<0.05, ** *P*<0.05 (compared with hGF+LPS). P-S: PSC-SPIONs.


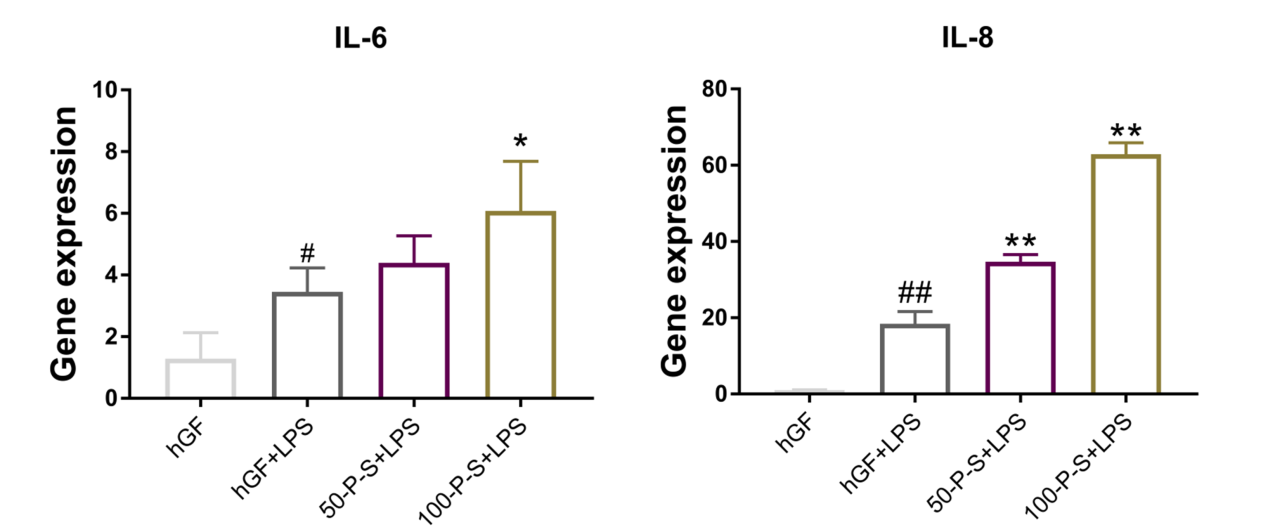


**3. Figure S3.** Iron content detection by inductively coupled plasma optical emission spectrometer (ICP-OES). The hGFs (5×105 cells/well) were treated by 5, 15, and 25 μg/mL PSC-SPIONs for 6 h and marked as 5-P-S, 15-P-S and 25-P-S. hGFs alone were the control group (hGF). The cells were washed 3 times with PBS and digested. Then they were counted and lysed by 500 μL 64% nitric acid for 15 min. After diluted with deionized water to 5 mL, the intracellular iron content was detected by ICP-OES (Avio500, USA). The results show that the iron content of hGFs in 15-P-S and 25-P-S groups is obviously increased compared with 5-P-S and hGF control, while the iron content in the latter two groups is not detected may due to the extremely low iron content. ND-not detected. P-S: PSC-SPIONs.

**
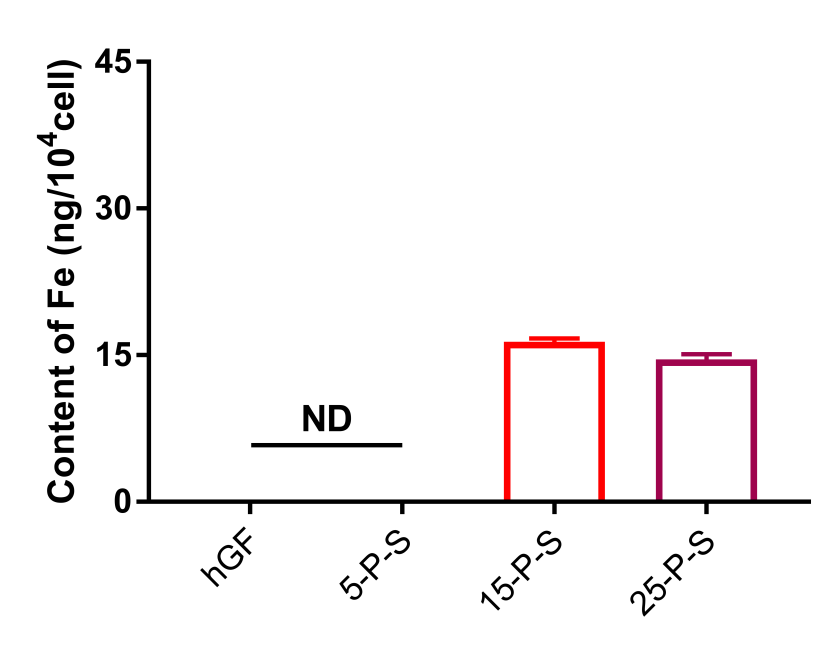
**
